# Supplementary material
Source: MDPI journal article supplement (https://www.mdpi.com/search?q=crystals-09-00416)
Supplement: s001 [file crystals-09-00416-s001.pdf]

Supplementary Materials

# N,O Chelating Ligands Construct Five-coordinated Zn(II) Exclusive {Zn<sub>6</sub>} Clusters: Decomposition, Stepwise Assembly and Photoluminescence Study

Qian-Jun Deng \* Min Chen <sup>1</sup> Dong-Chu Chen \* Chang-Ai Chen

School of Material Science and Energy Engineering, Foshan University, Foshan 528000, Guangdong, People's Republic of China.

| <b>Supporting Tables</b>  |                                                                                                                                                                     |
|---------------------------|---------------------------------------------------------------------------------------------------------------------------------------------------------------------|
| <b>Table S1</b>           | Crystallographic data of the complex <b>Zn6</b> .                                                                                                                   |
| <b>Table S2</b>           | Selected bond lengths (Å) and angles (°) of <b>Zn6</b> .                                                                                                            |
| <b>Table S3</b>           | <i>SHAPE</i> analysis of the Zn <sup>II</sup> ion in <b>Zn6</b> .                                                                                                   |
| <b>Table S4</b>           | Intramolecular and intermolecular weak action of <b>Zn6</b> .                                                                                                       |
| <b>Table S5</b>           | Analysis of molecular ion peaks of cluster <b>Zn6</b> in high resolution electrospray mass spectrometry (HRESI-MS) with different ion source voltages.              |
| <b>Table S6</b>           | The HRESI-MS fragment of the cluster <b>Zn6</b> formation process was analyzed at different time periods.                                                           |
| <b>Supporting Figures</b> |                                                                                                                                                                     |
| <b>Figure S1</b>          | The intramolecular and intermolecular weak interaction of the cluster <b>Zn6</b> .                                                                                  |
| <b>Figure S2</b>          | Intermolecular stacking diagram of cluster <b>Zn6</b> .                                                                                                             |
| <b>Figure S3</b>          | Cluster <b>Zn6</b> experiments and fitting PXRD patterns (a) and thermogravimetric analysis (b).                                                                    |
| <b>Figure S4</b>          | HRESI-MS diagram of cluster <b>Zn6</b> under different ion source voltage conditions.                                                                               |
| <b>Figure S5</b>          | HRESI-MS spectrum of cluster <b>Zn6</b> at 0 eV.                                                                                                                    |
| <b>Figure S6</b>          | The superposed simulated and observed spectra of several species for <b>Zn6</b> (Positive mode).                                                                    |
| <b>Figure S7</b>          | The HRESI-MS spectrum of the reaction process of the cluster <b>Zn6</b> in different time periods (Positive mode).                                                  |
| <b>Figure S8</b>          | The HRESI-MS spectrum of the reaction process of the cluster <b>Zn6</b> in different time periods (Positive mode).                                                  |
| <b>Figure S9</b>          | The HRESI-MS spectrum of the reaction process of the cluster <b>Zn6</b> in different time periods (Negative mode).                                                  |
| <b>Figure S10</b>         | The superposed simulated and observed spectra of several species in the time-dependent ESI-MS of <b>Zn6</b> (Positive mode).                                        |
| <b>Figure S11</b>         | <b>Figure S11.</b> The superposed simulated and observed spectra of several species in the time-dependent ESI-MS of <b>Zn6</b> (Negative mode).                     |
| <b>Figure S12</b>         | The emission peak (Em) obtained by exciting the DMF solution of the complex <b>Zn6</b> with excitation (Ex) wavelengths of 290 nm (a) and 267 nm (b), respectively. |

**Table S1.** Crystallographic data of the complex **Zn6**.

| <b>Complex</b>                                                  | <b>Zn6</b>                                                                                                                                                   |
|-----------------------------------------------------------------|--------------------------------------------------------------------------------------------------------------------------------------------------------------|
| Formula                                                         | Zn <sub>6</sub> C <sub>90</sub> H <sub>90</sub> N <sub>20</sub> O <sub>10</sub> ·4(NO <sub>3</sub> )·12(H <sub>2</sub> O)·2(C <sub>2</sub> H <sub>3</sub> N) |
| Weight                                                          | 2550.38                                                                                                                                                      |
| Crystal System                                                  | Monoclinic                                                                                                                                                   |
| Space Group                                                     | <i>P</i> 2 <sub>1</sub> / <i>c</i>                                                                                                                           |
| <i>T</i> (K)                                                    | 150                                                                                                                                                          |
| <i>a</i> (Å)                                                    | 14.9791 (2)                                                                                                                                                  |
| <i>b</i> (Å)                                                    | 14.2965 (2)                                                                                                                                                  |
| <i>c</i> (Å)                                                    | 25.4993 (3)                                                                                                                                                  |
| <i>α</i> (°)                                                    | 90                                                                                                                                                           |
| <i>β</i> (°)                                                    | 99.637(1)                                                                                                                                                    |
| <i>γ</i> (°)                                                    | 90                                                                                                                                                           |
| <i>V</i> (Å <sup>3</sup> )                                      | 5383.58(1)                                                                                                                                                   |
| <i>Z</i>                                                        | 2                                                                                                                                                            |
| <i>F</i> (000)                                                  | 2636                                                                                                                                                         |
| D <sub>calcd</sub> (g·cm <sup>-3</sup> )                        | 1.573                                                                                                                                                        |
| <i>μ</i> (mm <sup>-1</sup> )                                    | 2.27                                                                                                                                                         |
| Reflection collected                                            | 25439                                                                                                                                                        |
| Unique Reflection                                               | 9742                                                                                                                                                         |
| <i>R</i> <sub>int</sub>                                         | 0.029                                                                                                                                                        |
| <sup>a</sup> <i>R</i> <sub>1</sub> [ <i>I</i> ≥ 2σ( <i>I</i> )] | 0.063                                                                                                                                                        |
| <sup>b</sup> <i>wR</i> <sub>2</sub> (all data)                  | 0.186                                                                                                                                                        |
| GOF                                                             | 1.03                                                                                                                                                         |

$$^a R_1 = \frac{\sum ||F_o| - |F_c||}{\sum |F_o|}, \quad ^b wR_2 = \frac{[\sum w(F_o^2 - F_c^2)^2 / \sum w(F_o^2)^2]^{1/2}}$$

**Table S2.** Selected bond lengths (Å) and angles (°) of **Zn6**.

|                                      |                  |                                       |                  |
|--------------------------------------|------------------|---------------------------------------|------------------|
| <b>Zn2—O1<sup>i</sup></b>            | <b>2.260 (2)</b> | <b>Zn1—O1<sup>i</sup></b>             | <b>2.251 (2)</b> |
| Zn2—O2                               | 1.984 (2)        | Zn1—O1                                | 1.985 (2)        |
| Zn2—O3                               | 1.977 (2)        | Zn1—O2                                | 1.980 (2)        |
| Zn2—N1 <sup>i</sup>                  | 2.001 (3)        | Zn1—O4 <sup>i</sup>                   | 2.065 (2)        |
| Zn2—N4                               | 2.082 (3)        | Zn1—N6 <sup>i</sup>                   | 2.041 (3)        |
| Zn3—O4                               | 2.062 (2)        | O1—Zn2 <sup>i</sup>                   | 2.260 (2)        |
| Zn3—O3                               | 2.001 (2)        | O1—Zn1 <sup>i</sup>                   | 2.251 (2)        |
| Zn3—O5                               | 2.327 (3)        | O4—Zn1 <sup>i</sup>                   | 2.065 (2)        |
| Zn3—N7                               | 2.014 (3)        | N6—Zn1 <sup>i</sup>                   | 2.041 (3)        |
| Zn3—N10                              | 1.988 (3)        | N1—Zn2 <sup>i</sup>                   | 2.001 (3)        |
| O2—Zn2—O1 <sup>i</sup>               | 77.84 (8)        | N10—Zn3—O5                            | 74.94 (11)       |
| O2—Zn2—N1 <sup>i</sup>               | 115.72 (10)      | N10—Zn3—N7                            | 123.98 (11)      |
| O2—Zn2—N4                            | 80.98 (10)       | O1—Zn1—O1 <sup>i</sup>                | 79.42 (9)        |
| O3—Zn2—O1 <sup>i</sup>               | 85.05 (8)        | O1—Zn1—O4 <sup>i</sup>                | 101.12 (9)       |
| O3—Zn2—O2                            | 128.55 (9)       | O1—Zn1—N6 <sup>i</sup>                | 136.84 (10)      |
| O3—Zn2—N1 <sup>i</sup>               | 107.31 (10)      | O2—Zn1—O1                             | 107.14 (9)       |
| O3—Zn2—N4                            | 104.73 (10)      | O2—Zn1—O1 <sup>i</sup>                | 78.13 (9)        |
| N1 <sup>i</sup> —Zn2—O1 <sup>i</sup> | 78.10 (9)        | O2—Zn1—O4 <sup>i</sup>                | 96.36 (9)        |
| N1 <sup>i</sup> —Zn2—N4              | 116.00 (11)      | O2—Zn1—N6 <sup>i</sup>                | 111.20 (10)      |
| N4—Zn2—O1 <sup>i</sup>               | 158.28 (10)      | O4 <sup>i</sup> —Zn1—O1 <sup>i</sup>  | 174.32 (8)       |
| O4—Zn3—O5                            | 176.19 (9)       | N6 <sup>i</sup> —Zn1—O1 <sup>i</sup>  | 89.64 (9)        |
| O3—Zn3—O4                            | 94.19 (9)        | N6 <sup>i</sup> —Zn1—O4 <sup>i</sup>  | 93.69 (10)       |
| O3—Zn3—O5                            | 87.48 (9)        | Zn1—O1—Zn2 <sup>i</sup>               | 103.36 (9)       |
| O3—Zn3—N7                            | 105.39 (10)      | Zn1 <sup>i</sup> —O1—Zn2 <sup>i</sup> | 92.58 (8)        |
| N7—Zn3—O4                            | 83.02 (10)       | Zn1—O1—Zn1 <sup>i</sup>               | 100.58 (9)       |
| N7—Zn3—O5                            | 99.85 (11)       | Zn1—O2—Zn2                            | 110.67 (10)      |
| N10—Zn3—O4                           | 101.40 (10)      | Zn3—O4—Zn1 <sup>i</sup>               | 102.55 (10)      |
| N10—Zn3—O3                           | 129.42 (10)      |                                       |                  |

**Table S3.** SHAPE analysis of the Zn<sup>II</sup> ion in Zn6.

|     |              | <b>Ideal structures</b>        |
|-----|--------------|--------------------------------|
| Zn1 | 30.584       | Pentagon                       |
|     | 16.414       | Vacant octahedron              |
|     | <b>5.093</b> | <b>Trigonal bipyramid</b>      |
|     | 9.251        | Spherical square pyramid       |
|     | 19.237       | Johnson trigonal bipyramid J12 |
| Zn2 | 28.879       | Pentagon                       |
|     | 5.557        | Vacant octahedron              |
|     | <b>2.879</b> | <b>Trigonal bipyramid</b>      |
|     | 3.916        | Spherical square pyramid       |
| Zn3 | 4.271        | Johnson trigonal bipyramid J12 |
|     | 28.869       | Pentagon                       |
|     | 5.658        | Vacant octahedron              |
|     | <b>1.760</b> | <b>Trigonal bipyramid</b>      |
|     | 4.611        | Spherical square pyramid       |
|     | 2.982        | Johnson trigonal bipyramid J12 |

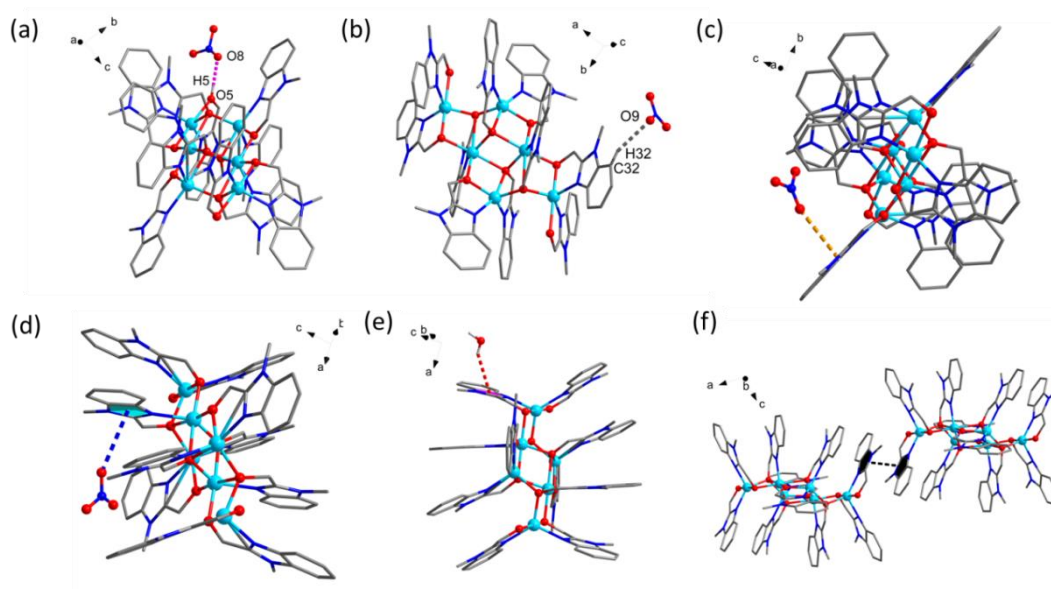

**Figure S1.** The intramolecular and intermolecular weak interaction of the cluster Zn6.

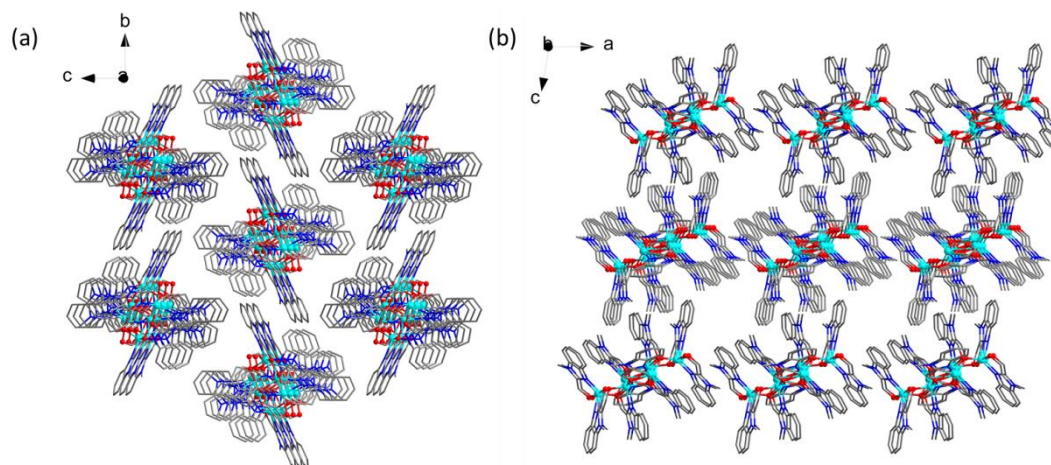

**Figure S2.** Intermolecular stacking diagram of cluster Zn6.

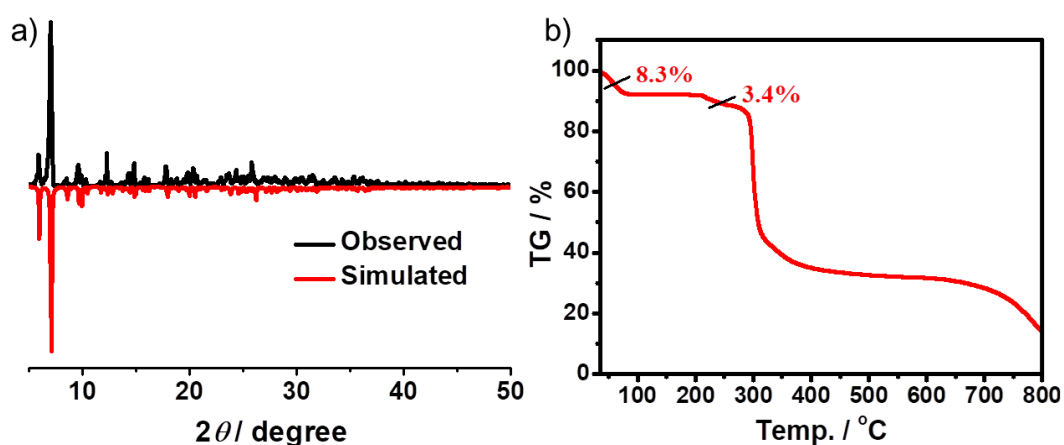

**Figure S3.** Cluster Zn6 experiments and fitting PXRD patterns (a) and thermogravimetric analysis (b).

**Table S4.** Intramolecular and intermolecular weak action of Zn6.

| Hydrogen bonds                                                       | Distance <sup>a</sup> , Å | Distance <sup>b</sup> , Å | Angle, ° |
|----------------------------------------------------------------------|---------------------------|---------------------------|----------|
| O <sub>5</sub> -H <sub>5</sub> ···O <sub>8</sub>                     | 1.81                      | 2.65                      | 168      |
| C <sub>32</sub> -H <sub>32</sub> ···O <sub>9</sub>                   | 2.60                      | 3.49                      | 161      |
| N-O···π                                                              | Distance <sup>c</sup> , Å | Distance <sup>d</sup> , Å | Angle, ° |
| N <sub>12</sub> -O <sub>9</sub> ···PhC <sub>3</sub> N <sub>2</sub>   | 3.44                      | 4.45                      | 154      |
| N <sub>12</sub> -O <sub>10</sub> ···PhC <sub>3</sub> N <sub>2</sub>  | 3.34                      | 4.45                      | 157      |
| O-H···π                                                              | Distance <sup>e</sup> , Å | Distance <sup>f</sup> , Å | Angle, ° |
| O <sub>17</sub> -H <sub>17B</sub> ···PhC <sub>3</sub> N <sub>2</sub> | 2.6                       | 3.42                      | 150      |
| π···π                                                                | Distance <sup>g</sup> , Å | Distance <sup>h</sup> , Å |          |
| PhC <sub>3</sub> N <sub>2</sub> ···PhC <sub>3</sub> N <sub>2</sub>   | 3.80                      | 3.47                      |          |

<sup>a</sup> is the distance from the donor to the acceptor on the donor; <sup>b</sup> is the distance from the donor to the acceptor; <sup>c</sup> is the distance from the O on the donor to the center of the plane; <sup>d</sup> is the distance from the donor N to the center of the plane; <sup>e</sup> is the distance from the H on the donor to the center of the plane; <sup>f</sup> is the distance from the donor to the center of the plane; <sup>g</sup> is the distance from the H on the donor to the center of the plane; <sup>h</sup> is the distance from the donor to the center of the plane.

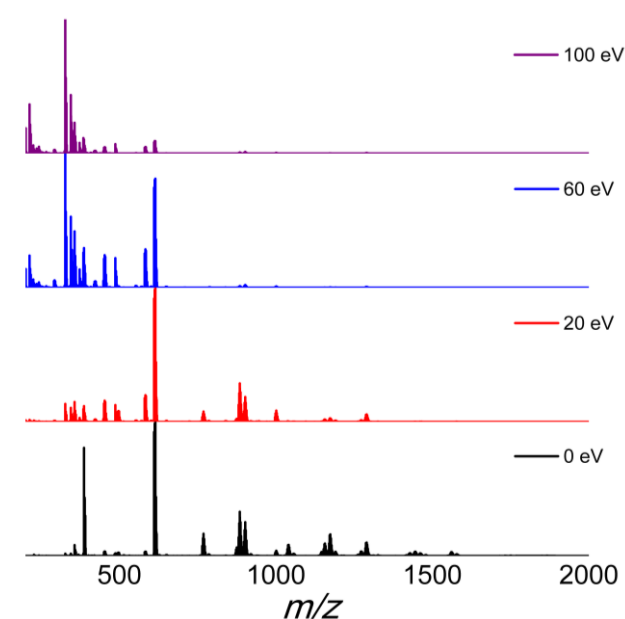

**Figure S4.** HRESI-MS diagram of cluster **Zn6** under different ion source voltage conditions (Positive mode).

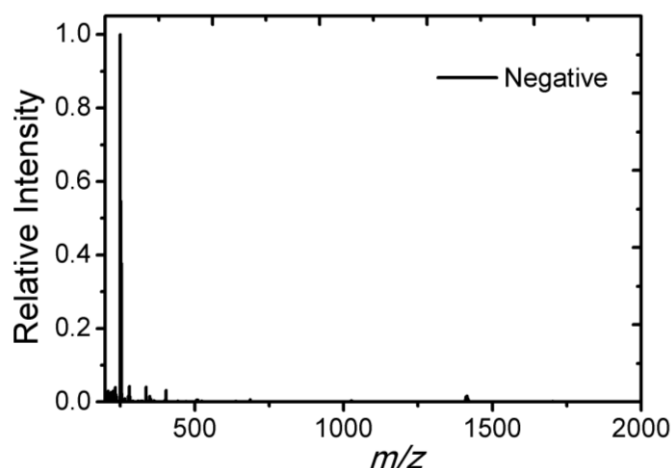

**Figure S5.** HRESI-MS spectrum of cluster **Zn6** at 0 eV (Negative mode).

**Table S5.** Analysis of molecular ion peaks of cluster **Zn6** in high resolution electrospray mass spectrometry (HRESI-MS) with different ion source voltages.

| Obs. m/z                | Formula(Calc. m/z)                                                                                                                      | Intensity (%) |       |       |        |
|-------------------------|-----------------------------------------------------------------------------------------------------------------------------------------|---------------|-------|-------|--------|
|                         |                                                                                                                                         | 0 eV          | 20 eV | 60 eV | 100 eV |
| <b>Positive mode</b>    |                                                                                                                                         |               |       |       |        |
| <b>[Zn<sub>1</sub>]</b> |                                                                                                                                         |               |       |       |        |
| 225.00                  | [Zn( <i>mbm</i> )] <sup>+</sup> (225.00)                                                                                                | -             | -     | 6.17  | 6.20   |
| 243.01                  | [Zn( <i>mbm</i> )(H <sub>2</sub> O)] <sup>+</sup> (243.01)                                                                              | 0.46          | 0.40  | 4.13  | 4.98   |
| 266.03                  | [Zn( <i>mbm</i> )(CH <sub>3</sub> CN)] <sup>+</sup> (266.03)                                                                            | 0.17          | 0.15  | 1.06  | 1.16   |
| 387.08                  | [HZn( <i>mbm</i> ) <sub>2</sub> ] <sup>+</sup> (387.08)                                                                                 | 80.77         | 11.75 | 29.24 | 11.58  |
| <b>[Zn<sub>2</sub>]</b> |                                                                                                                                         |               |       |       |        |
| 453.01                  | [Zn <sub>2</sub> ( <i>mbm</i> )(OH)(CH <sub>3</sub> O)(H <sub>2</sub> O) <sub>2</sub> (DMSO)] <sup>+</sup> (452.98)                     | 3.32          | 15.76 | 24.20 | 4.70   |
| 497.00                  | [Zn <sub>2</sub> ( <i>mbm</i> )(NO <sub>3</sub> ) <sub>2</sub> (CH <sub>3</sub> CN) <sub>2</sub> ] <sup>+</sup> (496.95)                | 2.49          | 8.12  | 0.96  | -      |
| 513.99                  | [Zn <sub>2</sub> ( <i>mbm</i> ) <sub>2</sub> (NO <sub>3</sub> )] <sup>+</sup> (513.99)                                                  | 0.50          | 0.20  | -     | -      |
| 583.06                  | [Zn <sub>2</sub> ( <i>mbm</i> ) <sub>2</sub> (OH)(H <sub>2</sub> O) <sub>2</sub> (DMSO)] <sup>+</sup> (583.06)                          | 3.23          | 19.78 | 28.70 | 4.84   |
| 613.07                  | [Zn <sub>2</sub> ( <i>mbm</i> ) <sub>3</sub> ] <sup>+</sup> (613.07)                                                                    | 100           | 100   | 80.53 | 9.28   |
| <b>[Zn<sub>3</sub>]</b> |                                                                                                                                         |               |       |       |        |
| 785.98                  | [Zn <sub>3</sub> ( <i>mbm</i> ) <sub>2</sub> (NO <sub>3</sub> ) <sub>3</sub> (CH <sub>3</sub> CN) <sub>2</sub> ] <sup>+</sup> (785.98)  | 1.23          | 0.68  | -     | -      |
| 885.07                  | [Zn <sub>3</sub> ( <i>mbm</i> ) <sub>3</sub> (NO <sub>3</sub> ) <sub>2</sub> (CH <sub>3</sub> CN) <sub>2</sub> ] <sup>+</sup> (885.07)  | 32.88         | 28.71 | 1.20  | 0.81   |
| 902.06                  | [Zn <sub>3</sub> ( <i>mbm</i> ) <sub>4</sub> (NO <sub>3</sub> )] <sup>+</sup> (902.06)                                                  | 25.11         | 18.50 | 2.03  | 1.20   |
| 1001.14                 | [Zn <sub>3</sub> ( <i>mbm</i> ) <sub>5</sub> ] <sup>+</sup> (1001.14)                                                                   | 3.93          | 8.40  | 0.92  | 0.50   |
| <b>[Zn<sub>4</sub>]</b> |                                                                                                                                         |               |       |       |        |
| 1174.05                 | [Zn <sub>4</sub> ( <i>mbm</i> ) <sub>5</sub> (NO <sub>3</sub> )(C <sub>2</sub> H <sub>5</sub> O)] <sup>+</sup> (1174.09)                | 16.16         | 2.60  | 0.23  | 0.14   |
| 1191.04                 | [Zn <sub>4</sub> ( <i>mbm</i> ) <sub>5</sub> (NO <sub>3</sub> ) <sub>2</sub> ] <sup>+</sup> (1191.04)                                   | 3.06          | 0.89  | 0.09  | -      |
| 1290.13                 | [Zn <sub>4</sub> ( <i>mbm</i> ) <sub>6</sub> (NO <sub>3</sub> )] <sup>+</sup> (1290.13)                                                 | 9.92          | 5.47  | 0.54  | -      |
| <b>[Zn<sub>5</sub>]</b> |                                                                                                                                         |               |       |       |        |
| 1461.04                 | [Zn <sub>5</sub> ( <i>mbm</i> ) <sub>5</sub> (NO <sub>3</sub> ) <sub>4</sub> (CH <sub>3</sub> CN) <sub>2</sub> ] <sup>+</sup> (1461.00) | 1.97          | 0.12  | -     | -      |
| 1480.03                 | [Zn <sub>5</sub> ( <i>mbm</i> ) <sub>6</sub> (NO <sub>3</sub> ) <sub>3</sub> ] <sup>+</sup> (1480.03)                                   | 0.71          | 0.02  | -     | -      |
| 1579.11                 | [Zn <sub>5</sub> ( <i>mbm</i> ) <sub>7</sub> (NO <sub>3</sub> ) <sub>2</sub> ] <sup>+</sup> (1579.11)                                   | 1.30          | 0.12  | -     | -      |
| <b>[Zn<sub>6</sub>]</b> |                                                                                                                                         |               |       |       |        |
| 1866.10                 | [Zn <sub>6</sub> ( <i>mbm</i> ) <sub>8</sub> (NO <sub>3</sub> ) <sub>3</sub> ] <sup>+</sup> (1866.10)                                   | 0.22          | -     | -     | -      |
| <b>Negative mode</b>    |                                                                                                                                         |               |       |       |        |
| 249.89                  | [Zn(NO <sub>3</sub> ) <sub>3</sub> ] <sup>-</sup> (249.89)                                                                              |               |       | 100   |        |
| <b>[Zn<sub>1</sub>]</b> |                                                                                                                                         |               |       |       |        |

|                         |                                                                               |      |
|-------------------------|-------------------------------------------------------------------------------|------|
| 348.98                  | $[\text{Zn}(\text{mbm})(\text{NO}_3)_2]^-$ (348.98)                           | 1.55 |
| <b>[Zn<sub>2</sub>]</b> |                                                                               |      |
| 493.89                  | $[\text{Zn}_2(\text{mbm})(\text{NO}_3)_3(\text{OH})]^-$ (493.89)              | 0.13 |
| 507.91                  | $[\text{Zn}_2(\text{mbm})(\text{NO}_3)_3(\text{CH}_3\text{O})]^-$ (507.91)    | 0.60 |
| 637.96                  | $[\text{Zn}_2(\text{mbm})_2(\text{NO}_3)_3]^-$ (637.96)                       | 0.19 |
| 737.05                  | $[\text{Zn}_2(\text{mbm})_3(\text{NO}_3)_2]^-$ (737.05)                       | 0.02 |
| <b>[Zn<sub>3</sub>]</b> |                                                                               |      |
| 926.95                  | $[\text{Zn}_3(\text{mbm})_3(\text{NO}_3)_4]^-$ (926.95)                       | 0.06 |
| 1026.03                 | $[\text{Zn}_3(\text{mbm})_4(\text{NO}_3)_3]^-$ (1026.03)                      | 0.41 |
| <b>[Zn<sub>4</sub>]</b> |                                                                               |      |
| 1270.04                 | $[\text{Zn}_4(\text{mbm})_5(\text{NO}_3)_3(\text{OH})]^-$ (1270.04)           | 0.05 |
| 1284.05                 | $[\text{Zn}_4(\text{mbm})_5(\text{NO}_3)_3(\text{CH}_3\text{O})]^-$ (1284.05) | 0.15 |
| 1315.02                 | $[\text{Zn}_4(\text{mbm})_5(\text{NO}_3)_4]^-$ (1315.02)                      | 0.11 |
| 1414.11                 | $[\text{Zn}_4(\text{mbm})_6(\text{NO}_3)_3]^-$ (1414.10)                      | 1.62 |
| <b>[Zn<sub>5</sub>]</b> |                                                                               |      |
| 1573.04                 | $[\text{Zn}_5(\text{mbm})_6(\text{NO}_3)_4(\text{CH}_3\text{O})]^-$ (1573.04) | 0.06 |
| 1604.01                 | $[\text{Zn}_5(\text{mbm})_6(\text{NO}_3)_5]^-$ (1604.01)                      | 0.03 |
| 1703.09                 | $[\text{Zn}_5(\text{mbm})_7(\text{NO}_3)_4]^-$ (1703.09)                      | 0.19 |

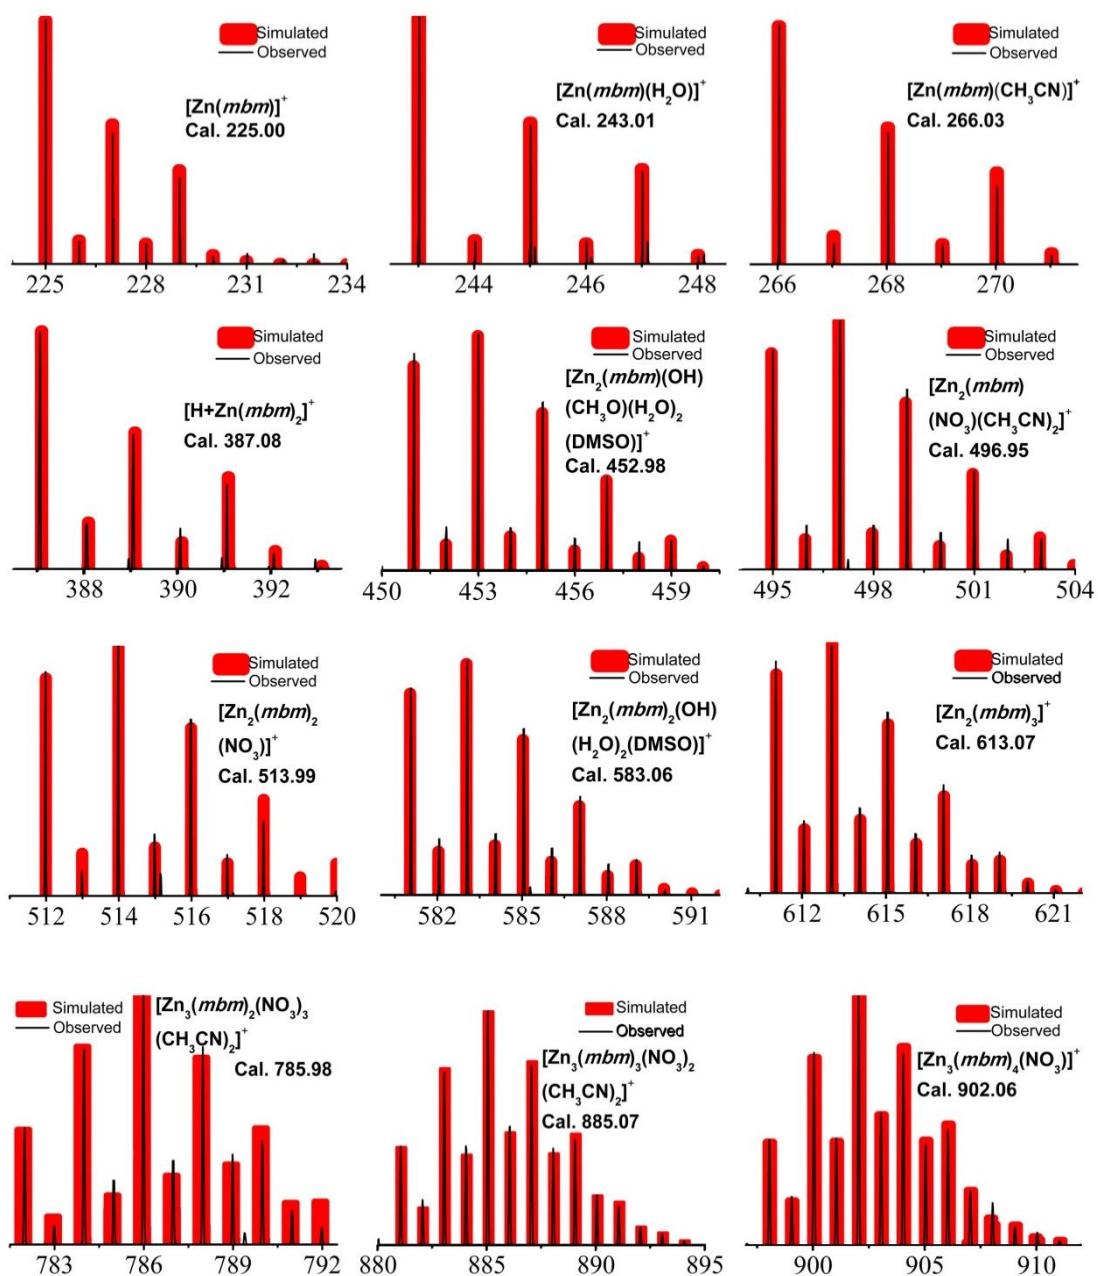

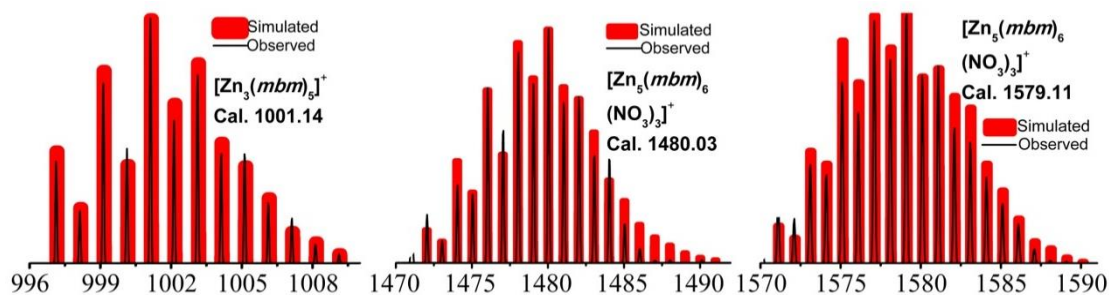

**Figure S6.** The superposed simulated and observed spectra of several species for Zn6 (Positive mode).

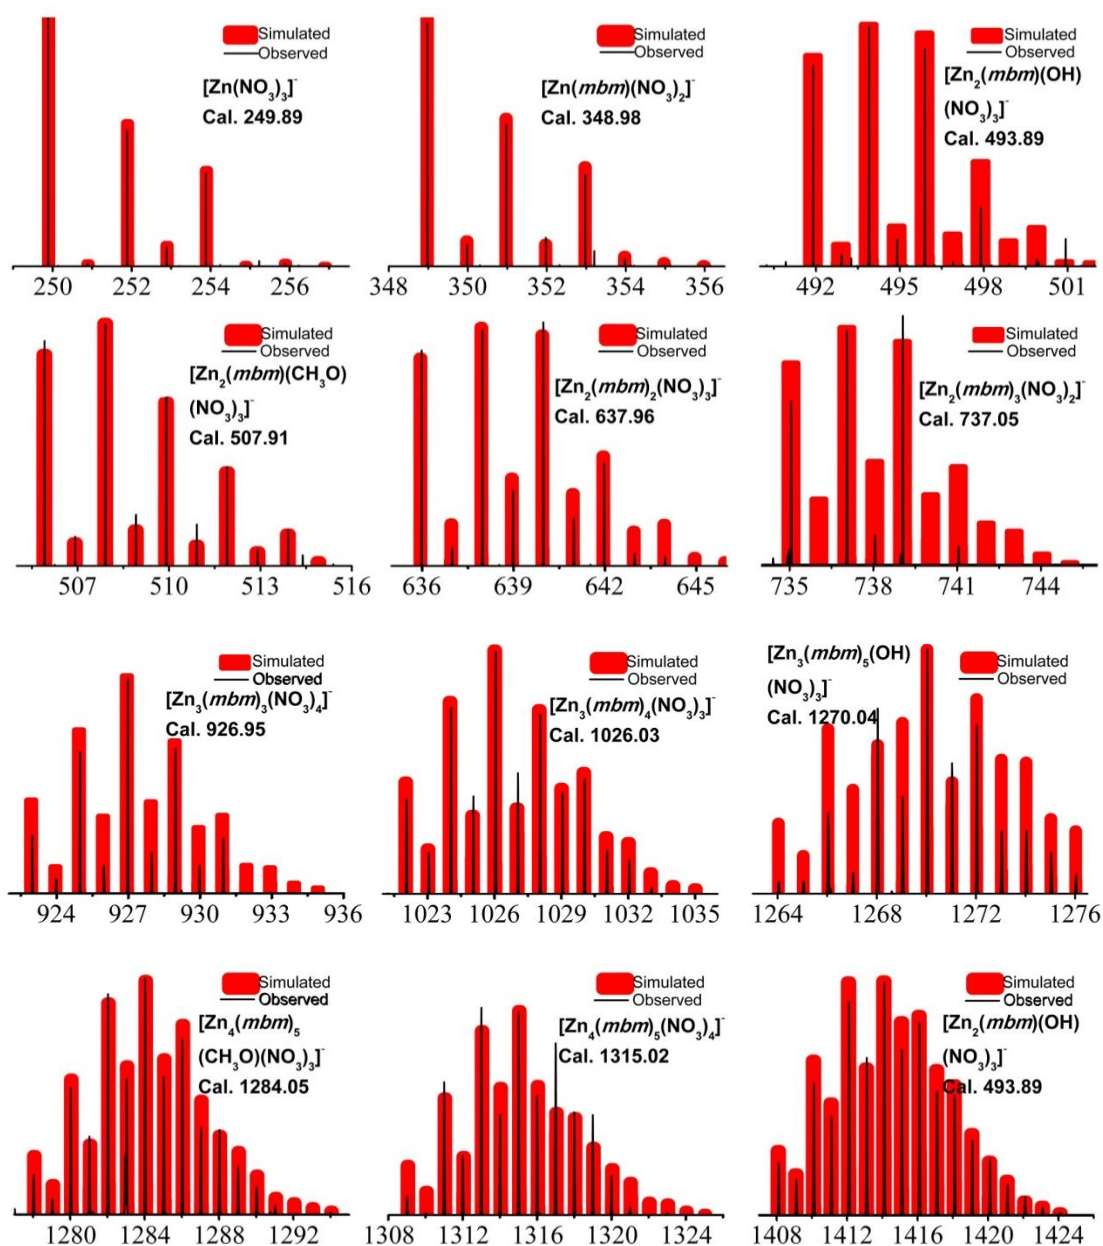

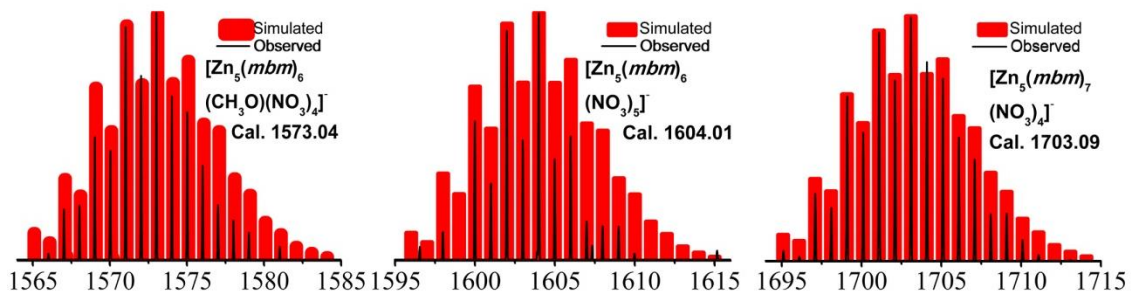

**Figure S7.** The superposed simulated and observed spectra of several species for **Zn6** (Negative mode).

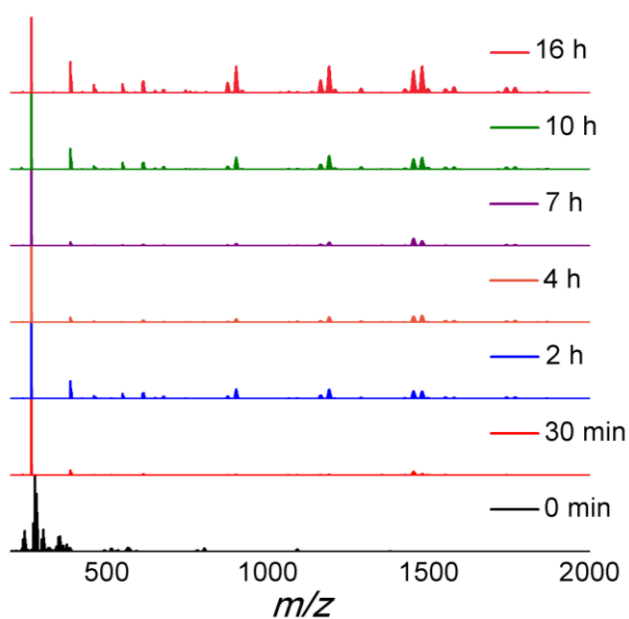

**Figure S8.** The HRESI-MS spectrum of the reaction process of the cluster **Zn6** in different time periods (Positive mode).

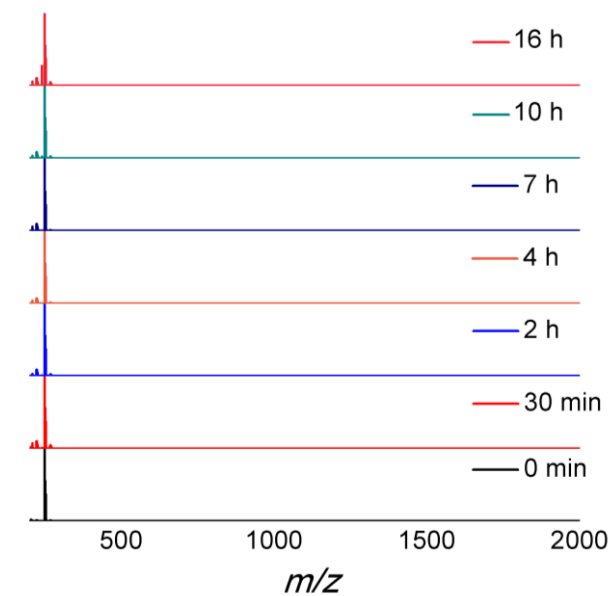



**Figure S9.** The HRESI-MS spectrum of the reaction process of the cluster **Zn6** in different time periods (Negative mode).

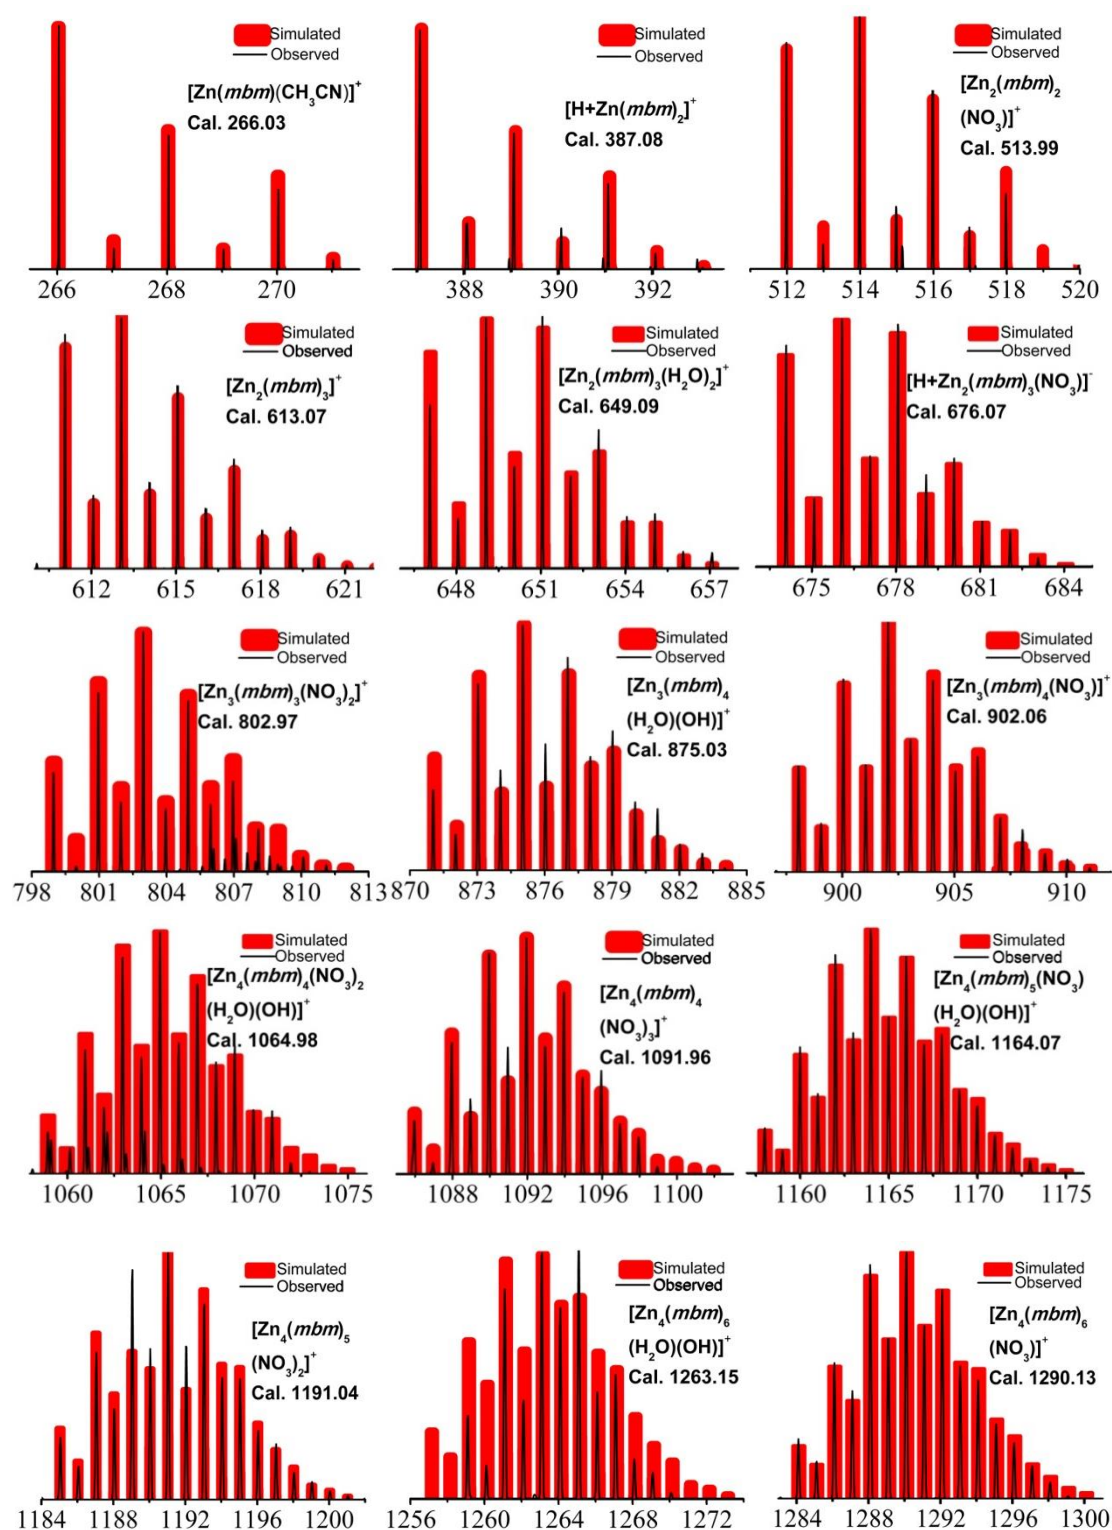

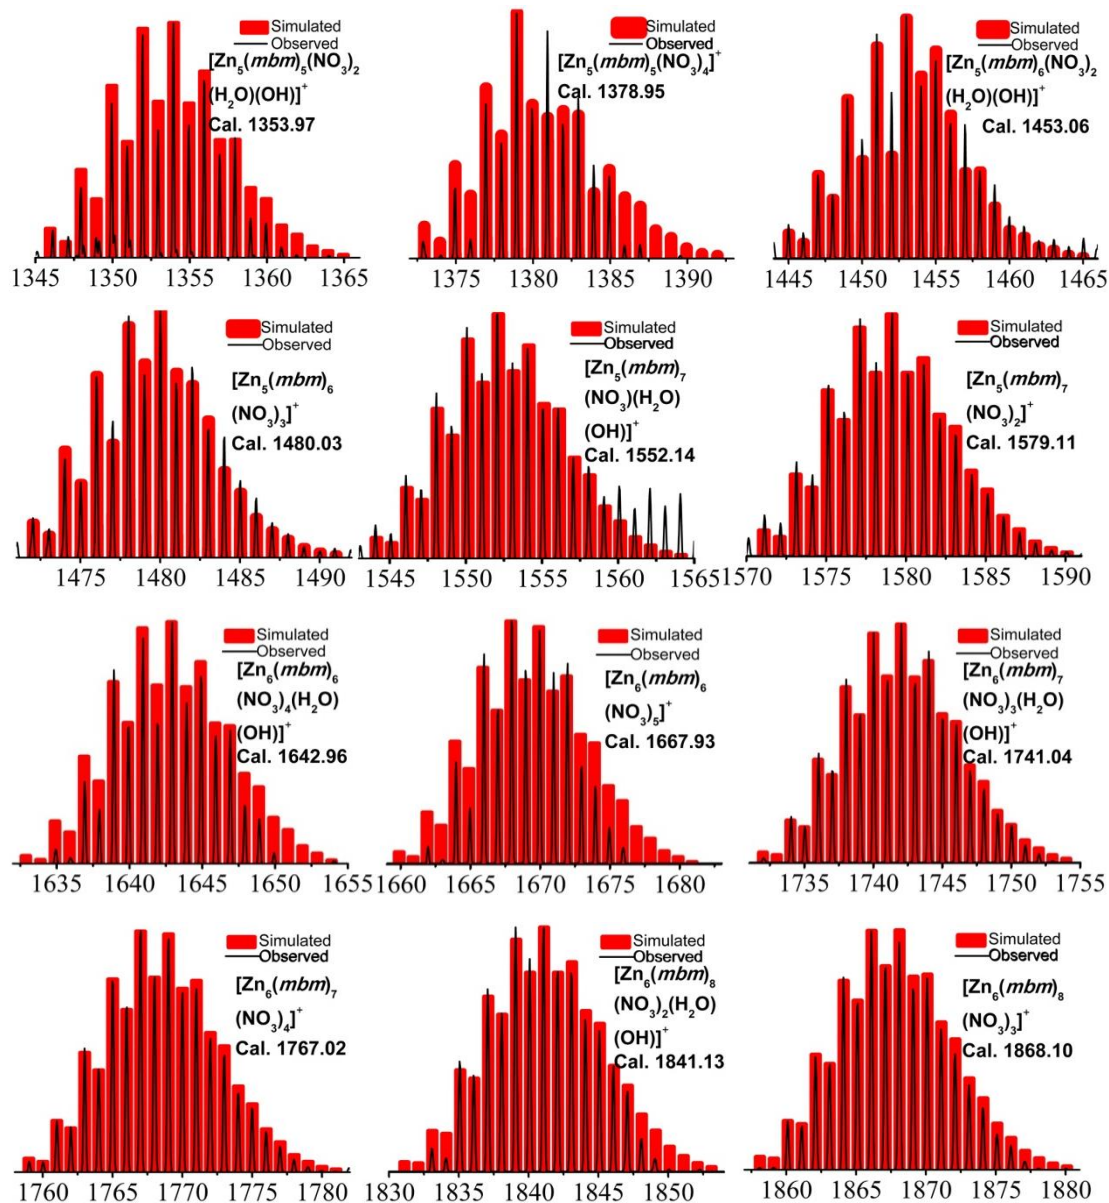

**Figure S10.** The superposed simulated and observed spectra of several species in the time-dependent ESI-MS of Zn6 (Positive mode).

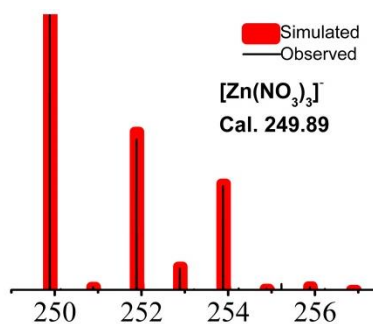

**Figure S11.** The superposed simulated and observed spectra of several species in the time-dependent ESI-MS of Zn6 (Negative mode).

**Table S6.** The HRESI-MS fragment of the cluster **Zn6** formation process was analyzed at different time periods.

| Obs. <i>m/z</i>         | Formula(Calc. <i>m/z</i> )                                                                                                  | Relative Intensity (%) |       |       |      |      |       |       |
|-------------------------|-----------------------------------------------------------------------------------------------------------------------------|------------------------|-------|-------|------|------|-------|-------|
|                         |                                                                                                                             | 0 h                    | 0.5 h | 2 h   | 4 h  | 7 h  | 10 h  | 16 h  |
| <b>Positive mode</b>    |                                                                                                                             |                        |       |       |      |      |       |       |
| <b>[Zn]</b>             |                                                                                                                             |                        |       |       |      |      |       |       |
| 266.03                  | [Zn( <i>mbm</i> )(CH <sub>3</sub> CN)] <sup>+</sup> (266.03)                                                                | 3.25                   | 100   | 100   | 100  | 100  | 100   | 100   |
| 387.08                  | [HZn( <i>mbm</i> ) <sub>2</sub> ] <sup>+</sup> (387.08)                                                                     | 5.00                   | 6.48  | 23.53 | 6.67 | 5.04 | 27.21 | 41.08 |
| <b>[Zn<sub>2</sub>]</b> |                                                                                                                             |                        |       |       |      |      |       |       |
| 513.99                  | [Zn <sub>2</sub> ( <i>mbm</i> ) <sub>2</sub> (NO <sub>3</sub> ) <sup>+</sup> (513.99)                                       | 4.60                   | 0.60  | 0.80  | 0.46 | 0.27 | 0.84  | 1.02  |
| 613.07                  | [Zn <sub>2</sub> ( <i>mbm</i> ) <sub>3</sub> ] <sup>+</sup> (613.07)                                                        | -                      | 1.38  | 7.93  | 2.86 | 1.83 | 9.25  | 15.55 |
| 649.04                  | [Zn <sub>2</sub> ( <i>mbm</i> ) <sub>3</sub> (H <sub>2</sub> O) <sub>2</sub> ] <sup>+</sup> (649.09)                        | -                      | 0.31  | 1.46  | 2.89 | 0.36 | 1.58  | 3.07  |
| 676.06                  | [H+Zn <sub>2</sub> ( <i>mbm</i> ) <sub>3</sub> (NO <sub>3</sub> ) <sup>+</sup> (676.07)                                     | -                      | 0.58  | 3.29  | 1.01 | 0.89 | 3.63  | 4.32  |
| <b>[Zn<sub>3</sub>]</b> |                                                                                                                             |                        |       |       |      |      |       |       |
| 802.97                  | [Zn <sub>3</sub> ( <i>mbm</i> ) <sub>3</sub> (NO <sub>3</sub> ) <sub>2</sub> ] <sup>+</sup> (802.97)                        | 4.65                   | 0.53  | 0.66  | 0.59 | 0.35 | 0.67  | 0.67  |
| 875.03                  | [Zn <sub>3</sub> ( <i>mbm</i> ) <sub>4</sub> (H <sub>2</sub> O)(OH)] <sup>+</sup> (875.08)                                  | -                      | 0.60  | 3.57  | 1.18 | 1.12 | 4.22  | 13.67 |
| 902.06                  | [Zn <sub>3</sub> ( <i>mbm</i> ) <sub>4</sub> (NO <sub>3</sub> ) <sup>+</sup> (902.10)                                       | -                      | 1.09  | 12.60 | 4.70 | 3.19 | 16.07 | 35.02 |
| <b>[Zn<sub>4</sub>]</b> |                                                                                                                             |                        |       |       |      |      |       |       |
| 1064.94                 | [Zn <sub>4</sub> ( <i>mbm</i> ) <sub>4</sub> (NO <sub>3</sub> ) <sub>2</sub> (H <sub>2</sub> O)(OH)] <sup>+</sup> (1064.98) | 0.47                   | 0.80  | 1.06  | 0.80 | 0.77 | 1.15  | 2.17  |
| 1091.96                 | [Zn <sub>4</sub> ( <i>mbm</i> ) <sub>4</sub> (NO <sub>3</sub> ) <sub>3</sub> ] <sup>+</sup> (1091.96)                       | 3.56                   | 0.61  | 1.23  | 1.38 | 0.76 | 1.33  | 1.57  |
| 1164.02                 | [Zn <sub>4</sub> ( <i>mbm</i> ) <sub>5</sub> (NO <sub>3</sub> )(H <sub>2</sub> O)(OH)] <sup>+</sup> (1164.07)               | -                      | 0.71  | 4.86  | 1.99 | 2.21 | 6.81  | 16.76 |
| 1191.04                 | [Zn <sub>4</sub> ( <i>mbm</i> ) <sub>5</sub> (NO <sub>3</sub> ) <sub>2</sub> ] <sup>+</sup> (1191.04)                       | -                      | 1.17  | 12.18 | 6.90 | 4.82 | 17.98 | 35.15 |
| 1263.10                 | [Zn <sub>4</sub> ( <i>mbm</i> ) <sub>6</sub> (H <sub>2</sub> O)(OH)] <sup>+</sup> (1263.15)                                 | -                      | -     | 0.25  | 0.22 | 0.05 | 0.37  | 0.84  |
| 1290.12                 | [Zn <sub>4</sub> ( <i>mbm</i> ) <sub>6</sub> (NO <sub>3</sub> ) <sup>+</sup> (1290.13)                                      | -                      | -     | 1.79  | 1.63 | 0.50 | 3.18  | 5.96  |
| <b>[Zn<sub>5</sub>]</b> |                                                                                                                             |                        |       |       |      |      |       |       |
| 1353.92                 | [Zn <sub>5</sub> ( <i>mbm</i> ) <sub>5</sub> (NO <sub>3</sub> ) <sub>3</sub> (H <sub>2</sub> O)(OH)] <sup>+</sup> (1353.97) | -                      | 0.72  | 0.62  | 0.84 | 0.91 | 0.66  | 1.06  |
| 1378.95                 | [Zn <sub>5</sub> ( <i>mbm</i> ) <sub>5</sub> (NO <sub>3</sub> ) <sub>4</sub> ] <sup>+</sup> (1378.95)                       | -                      | 0.29  | 0.44  | 0.68 | 0.41 | 0.52  | 0.62  |
| 1453.01                 | [Zn <sub>5</sub> ( <i>mbm</i> ) <sub>6</sub> (NO <sub>3</sub> ) <sub>2</sub> (H <sub>2</sub> O)(OH)] <sup>+</sup> (1453.06) | -                      | 4.74  | 10.33 | 8.02 | 9.59 | 13.62 | 29.38 |
| 1480.03                 | [Zn <sub>5</sub> ( <i>mbm</i> ) <sub>6</sub> (NO <sub>3</sub> ) <sub>3</sub> ] <sup>+</sup> (1480.03)                       | -                      | 1.90  | 9.82  | 8.84 | 6.55 | 15.31 | 34.89 |
| 1552.09                 | [Zn <sub>5</sub> ( <i>mbm</i> ) <sub>7</sub> (NO <sub>3</sub> )(H <sub>2</sub> O)(OH)] <sup>+</sup> (1552.14)               | -                      | 0.94  | 2.09  | 2.21 | 0.94 | 2.82  | 5.23  |
| 1579.11                 | [Zn <sub>5</sub> ( <i>mbm</i> ) <sub>7</sub> (NO <sub>3</sub> ) <sub>2</sub> ] <sup>+</sup> (1579.11)                       | -                      | 0.32  | 1.69  | 2.27 | 0.71 | 3.11  | 7.85  |
| <b>[Zn<sub>6</sub>]</b> |                                                                                                                             |                        |       |       |      |      |       |       |
| 1642.91                 | [Zn <sub>6</sub> ( <i>mbm</i> ) <sub>6</sub> (NO <sub>3</sub> ) <sub>4</sub> (H <sub>2</sub> O)(OH)] <sup>+</sup> (1642.96) | -                      | 0.27  | 0.23  | 0.36 | 0.39 | 0.26  | 0.53  |
| 1667.93                 | [Zn <sub>6</sub> ( <i>mbm</i> ) <sub>6</sub> (NO <sub>3</sub> ) <sub>5</sub> ] <sup>+</sup> (1667.93)                       | -                      | -     | -     | 0.27 | 0.19 | 0.17  | 0.14  |
| 1741.99                 | [Zn <sub>6</sub> ( <i>mbm</i> ) <sub>7</sub> (NO <sub>3</sub> ) <sub>3</sub> (H <sub>2</sub> O)(OH)] <sup>+</sup> (1742.04) | -                      | 0.66  | 2.06  | 1.56 | 1.87 | 2.84  | 6.76  |
| 1767.01                 | [Zn <sub>6</sub> ( <i>mbm</i> ) <sub>7</sub> (NO <sub>3</sub> ) <sub>4</sub> ] <sup>+</sup> (1767.02)                       | -                      | 0.47  | 2.26  | 2.33 | 1.79 | 3.40  | 7.35  |
| 1841.08                 | [Zn <sub>6</sub> ( <i>mbm</i> ) <sub>8</sub> (NO <sub>3</sub> ) <sub>2</sub> (H <sub>2</sub> O)(OH)] <sup>+</sup> (1841.13) | -                      | 0.15  | 0.58  | 0.59 | 0.38 | 0.71  | 1.26  |
| 1868.10                 | [Zn <sub>6</sub> ( <i>mbm</i> ) <sub>8</sub> (NO <sub>3</sub> ) <sub>3</sub> ] <sup>+</sup> (1868.10)                       | -                      | -     | 0.98  | 1.16 | 0.54 | 1.33  | 2.04  |
| <b>Negative mode</b>    |                                                                                                                             |                        |       |       |      |      |       |       |
| 249.89                  | [Zn(NO <sub>3</sub> ) <sub>3</sub> ] <sup>-</sup> (249.89)                                                                  | 100                    | 100   | 100   | 100  | 100  | 100   | 100   |

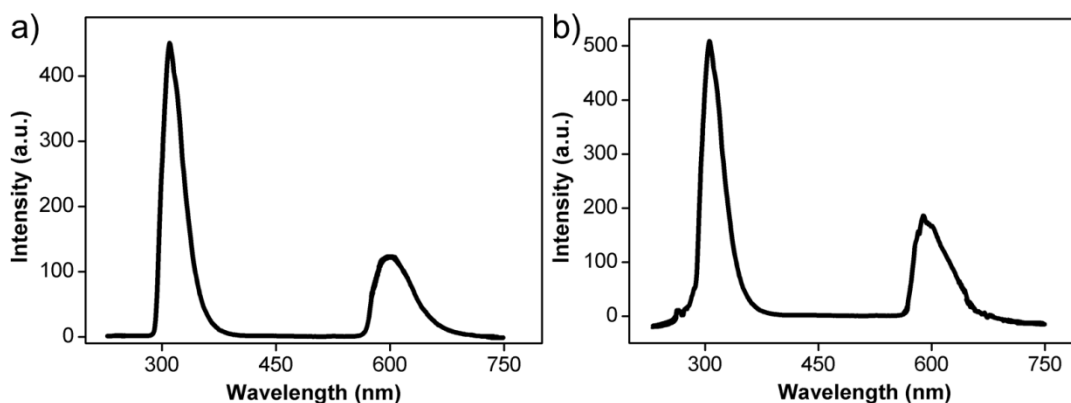

**Figure S12.** The emission peak (Em) obtained by exciting the DMF solution of the complex **Zn6** with excitation (Ex) wavelengths of 290 nm (a) and 267 nm (b), respectively.
